# Supplementary material for: Proliferation of group II introns in the chloroplast genome of the green alga Oedocladium carolinianum (Chlorophyceae)
Source: PubMed Central journal article supplement (PMC5088586; doi:10.7717/peerj.2627), 2016-10-25

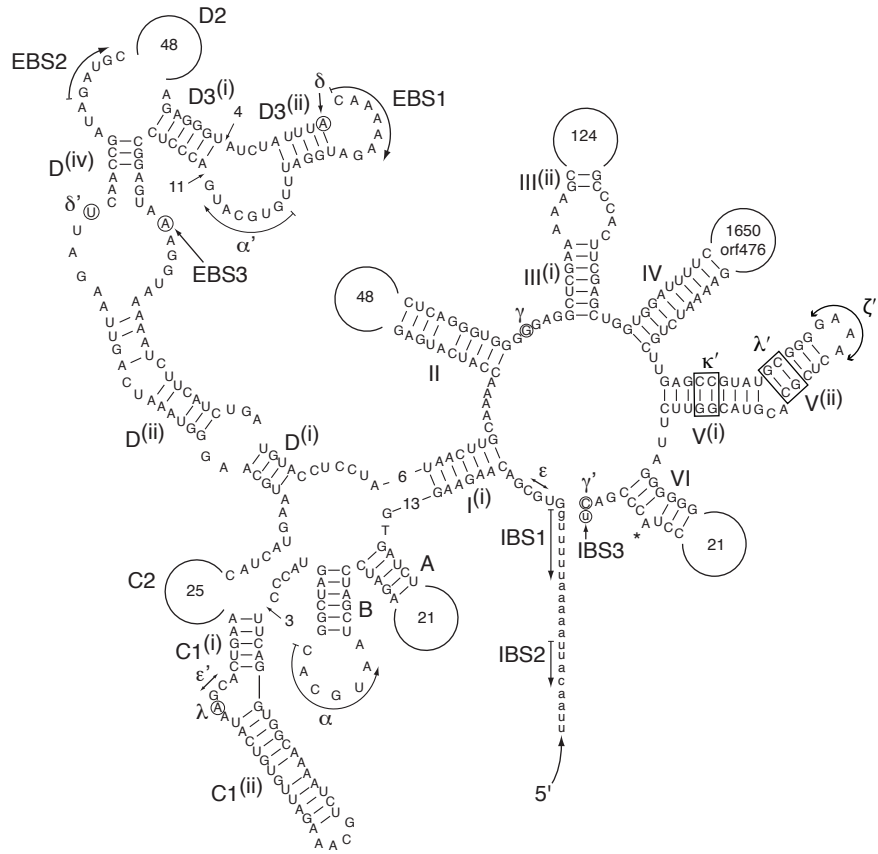

Supplement: peerj-04-2627-s001.pdf [file peerj-04-2627-s001.pdf]
